# Supplementary material for: Double pH-responsive supramolecular copolymer micelles based on the complementary multiple hydrogen bonds of nucleobases and acetalated dextran for drug delivery
Source: Royal Society of Chemistry journal article supplement (doi:10.1039/c5py00042d), 2015-01-01
Supplement: c5py00042d1.pdf [file c5py00042d1.pdf]

## Supporting Information

### **Double pH-Responsive Supramolecular Copolymer Micelles Based on the Complementary Multiple Hydrogen Bonds of Nucleobases and Acetalated Dextran for Drug Delivery**

Huihui Kuang,<sup>a,b</sup> Yanjuan Wu,<sup>a,b</sup> Zhiyun Zhang,<sup>a,b</sup> Jizhen Li,<sup>c</sup> Xuesi Chen,<sup>d</sup> Zhigang Xie,<sup>a</sup> Xiabin Jing,<sup>a</sup> and Yubin Huang<sup>\*a</sup>

<sup>a</sup> State Key Laboratory of Polymer Physics and Chemistry, Changchun Institute of Applied Chemistry, Chinese Academy of Sciences, Changchun 130022, P. R. China

<sup>b</sup> University of Chinese Academy of Sciences, Beijing 100039, P. R. China

<sup>c</sup> Department of Organic Chemistry, College of Chemistry, Jilin University, Changchun 130023, P. R. China

<sup>d</sup> Key Laboratory of Polymer Ecomaterials, Changchun Institute of Applied Chemistry, Chinese Academy of Sciences, Changchun, 130022, China

\*Correspondence to: Yubin Huang, State Key Laboratory of Polymer Physics and Chemistry, Changchun Institute of Applied Chemistry, Chinese Academy of Sciences, Changchun 130022, People's Republic of China. Tel & Fax: +86-431-85262769; E-mail: [ybhuang@ciac.ac.cn](mailto:ybhuang@ciac.ac.cn)

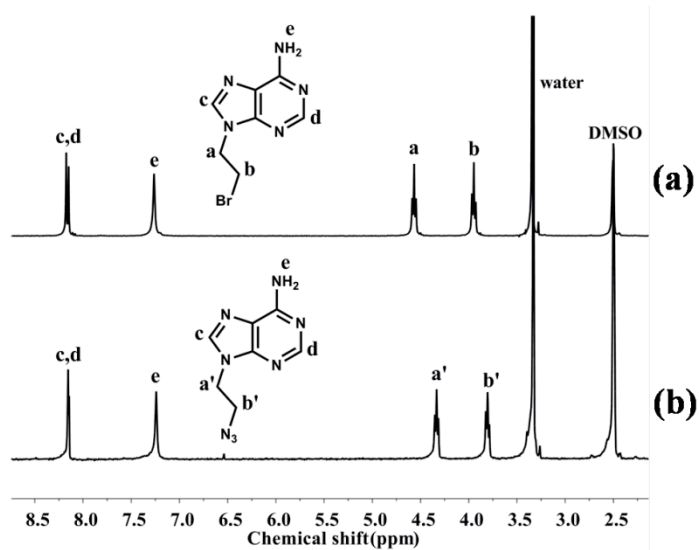

**Figure S1.** The  $^1\text{H}$  NMR spectra of 9-(2-bromoethyl)adenine (a) and A- $\text{N}_3$  (b) in  $\text{DMSO-}d_6$ .

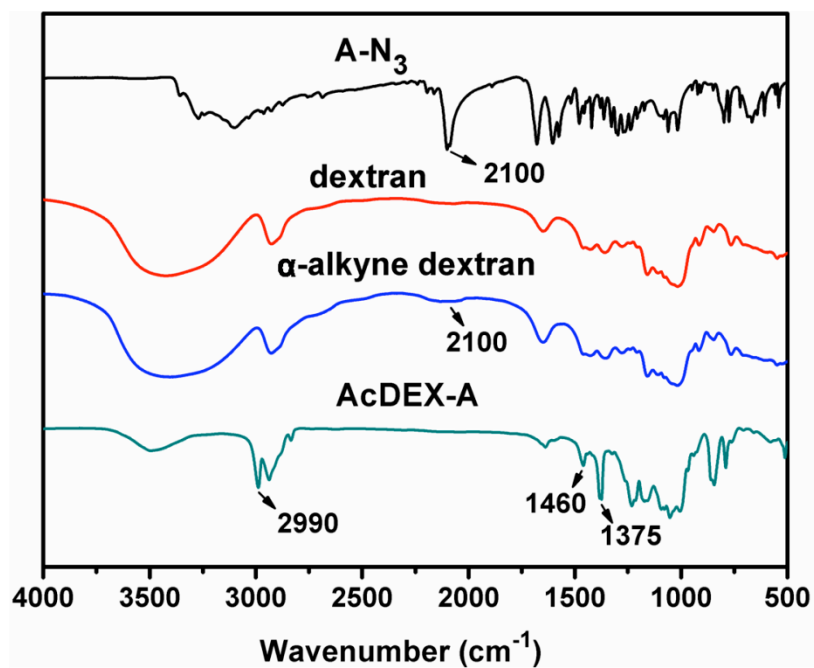

**Figure S2.** FT-IR spectra of A- $\text{N}_3$ , dextran,  $\alpha$ -alkyne dextran and Ac-DEX-A.

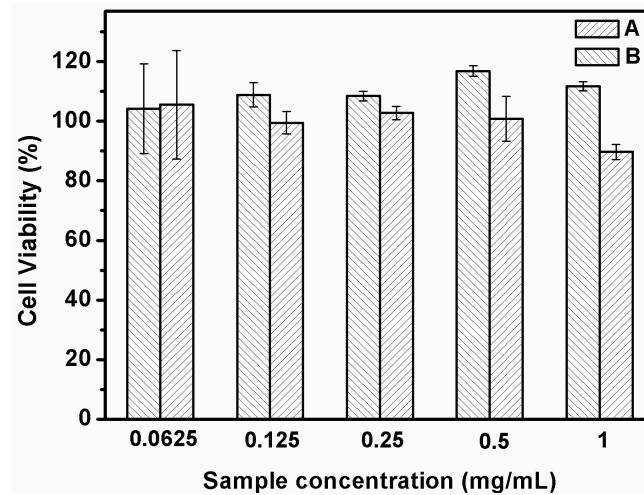

**Figure S3.** Cellular survival rates of L929 cells cultured with the (A) AcDEX1-A:T-PEG-T:A-AcDEX1 micelles and AcDEX2-A:T-PEG-T:A-AcDEX2 micelles (B) determined by MTT method.

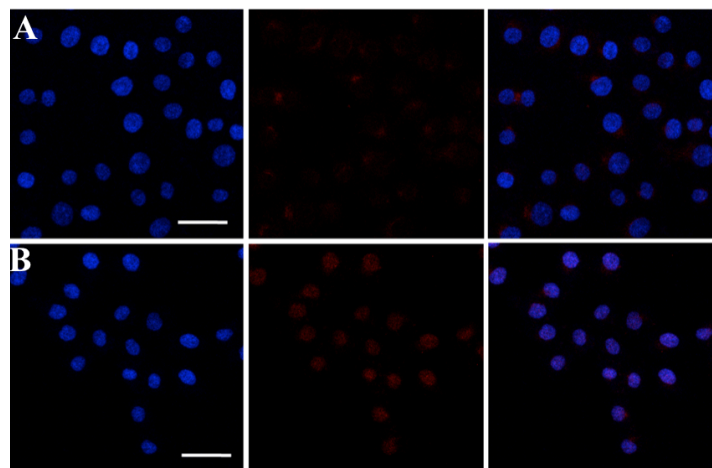

**Figure S4.** CLSM-images of HeLa cells incubated with DOX-loaded AcDEX2-A:T-PEG-T:A-AcDEX2 micelle for 0.5 (A) and 4 h (B). For each row, images from left to right were: cells with nucleus stained with DAPI (blue), with DOX (red) fluorescence and overlaid images. Bar = 50  $\mu$ m.
